# Supplementary material for: Intratumoral T-cell composition predicts epcoritamab-based treatment efficacy in B-cell non-Hodgkin lymphomas
Source: PubMed Central journal article supplement — medRxiv. 2024 Jul 5:2024.07.02.24309792. Preprint. [Version 1] doi: 10.1101/2024.07.02.24309792 (PMC11245087; doi:10.1101/2024.07.02.24309792), 2024-07-05
Supplement: media-1.pdf [file media-1.pdf]

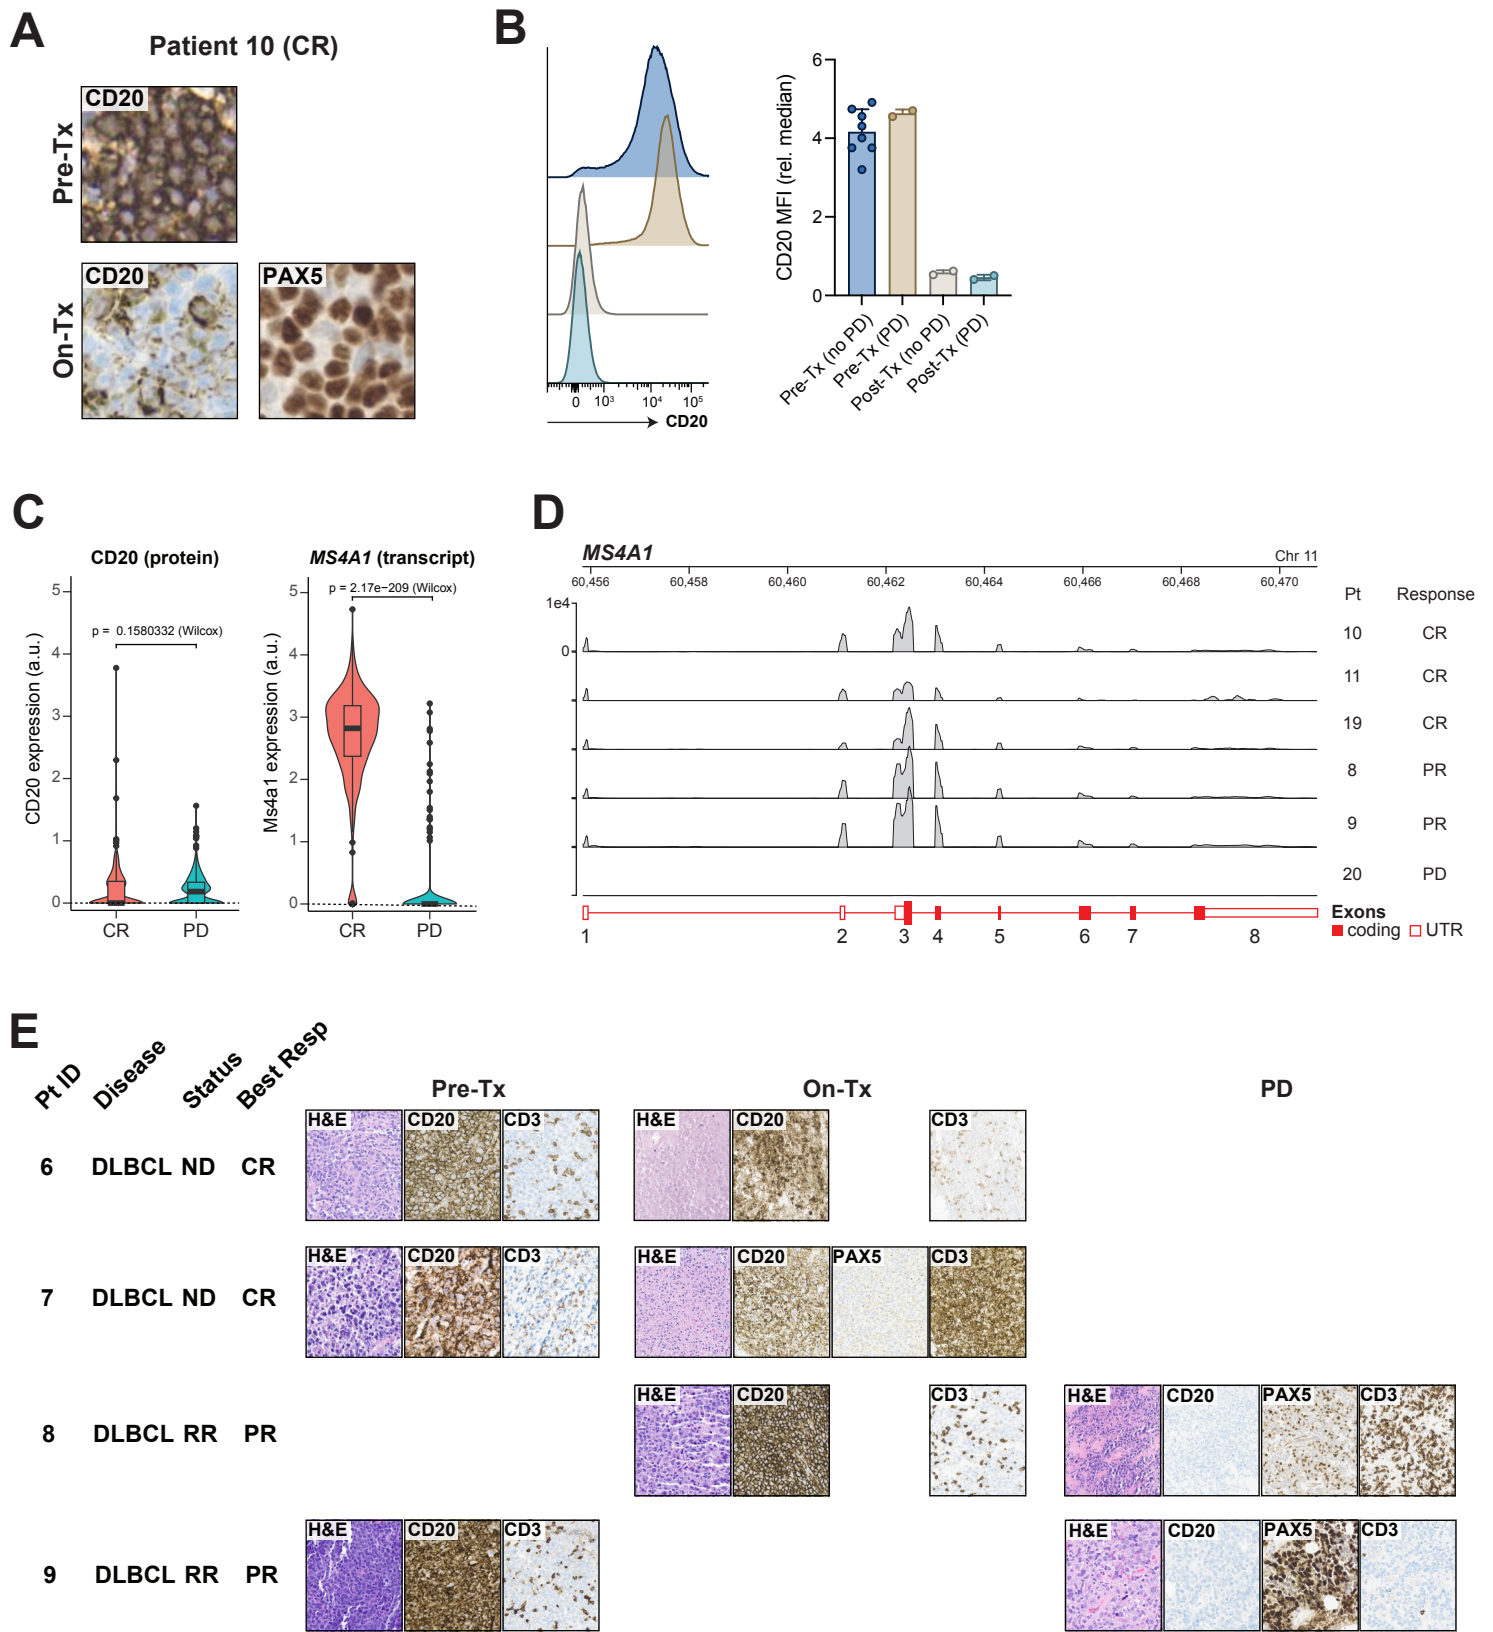

Supplementary Figure 1.

**A**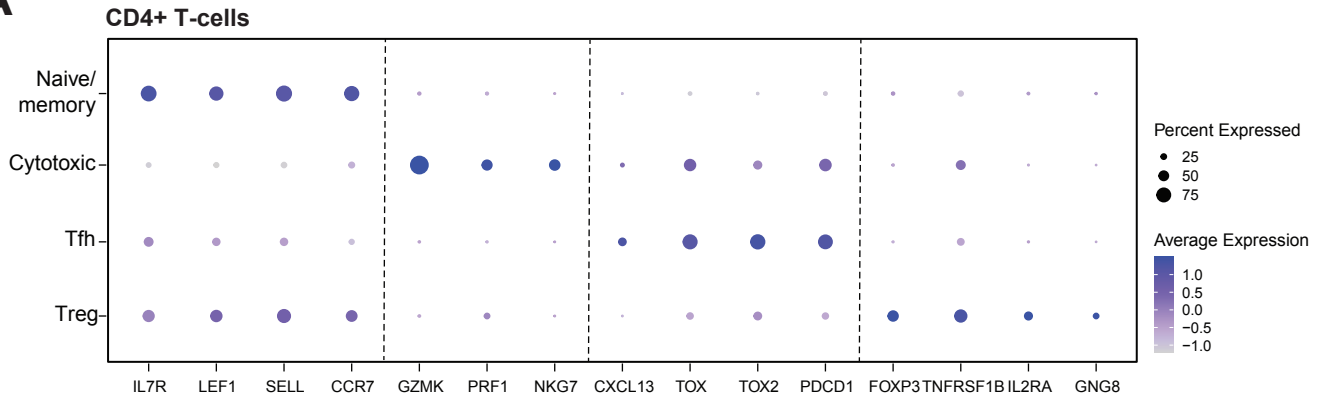**B**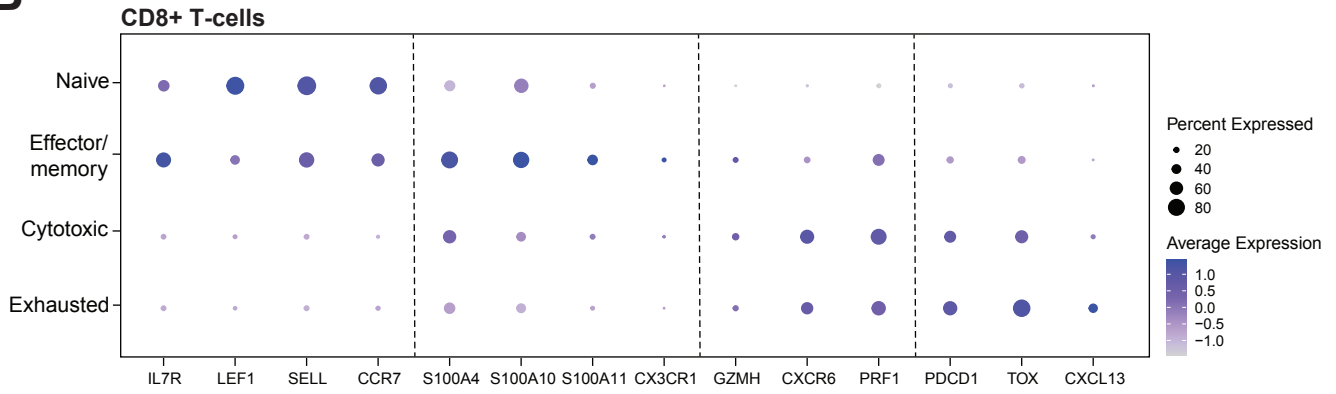**C**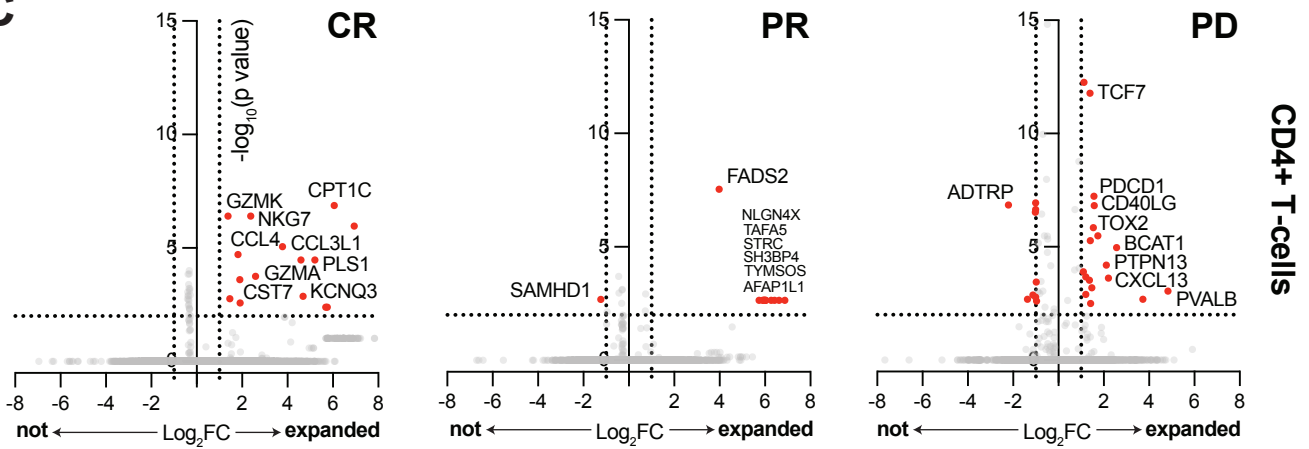**D**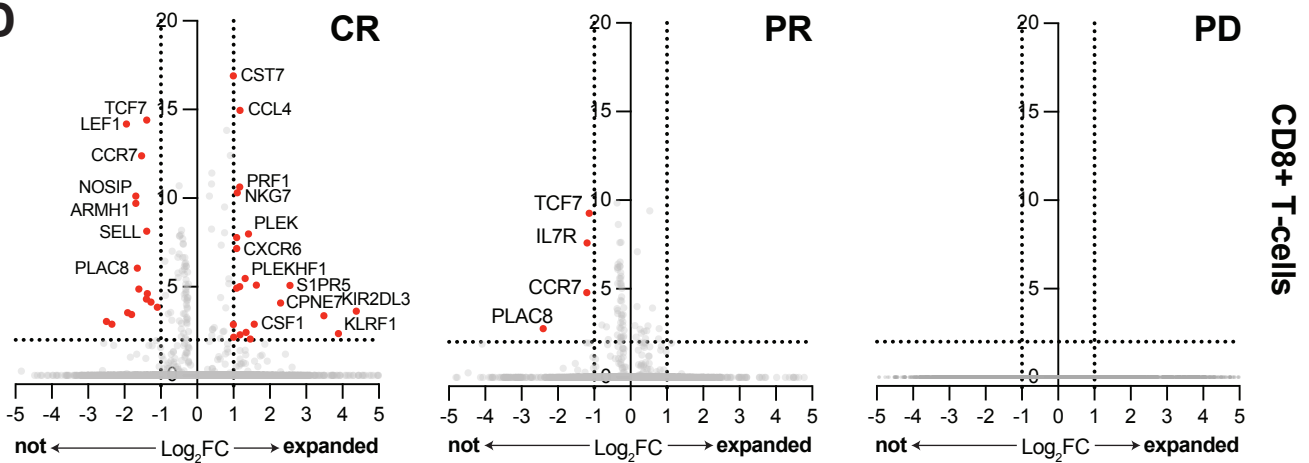

Supplementary Figure 2.

**A**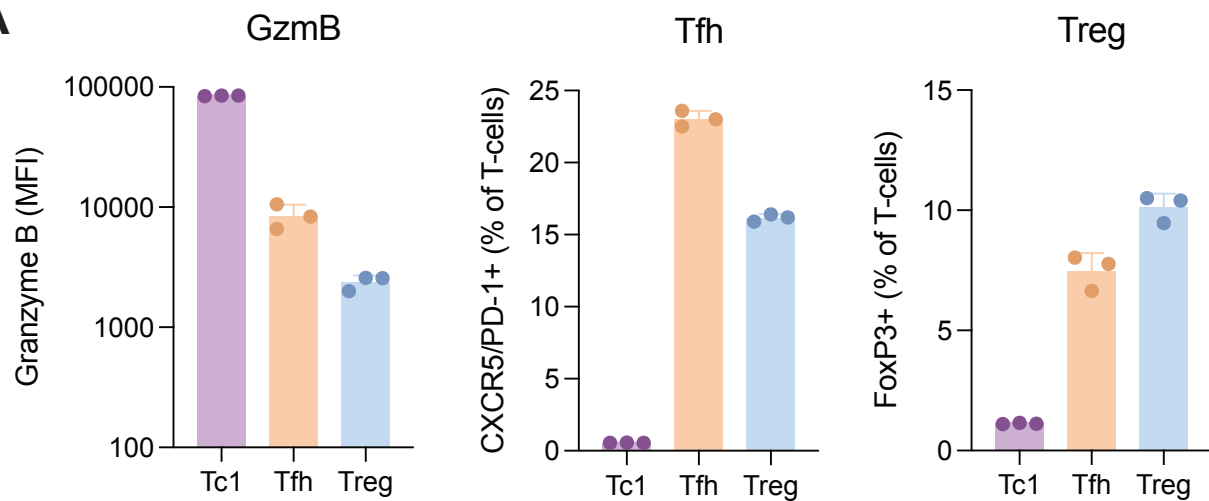**Supplementary Figure 3.**
