# Supplementary material for: Intratumoral T-cell composition predicts epcoritamab-based treatment efficacy in B-cell non-Hodgkin lymphomas
Source: PubMed Central journal article supplement — medRxiv. 2024 Jul 5:2024.07.02.24309792. Preprint. [Version 1] doi: 10.1101/2024.07.02.24309792 (PMC11245087; doi:10.1101/2024.07.02.24309792), 2024-07-05
Supplement: NIHPP2024.07.02.24309792V1-supplement-1.pdf [file NIHPP2024.07.02.24309792V1-supplement-1.pdf]

## Supplementary Table 1. Types of correlative analyses run on samples from NCT #04663347.

| Patient N. | Pre-Tx |     | On-Tx |     |       | POD |     |
|------------|--------|-----|-------|-----|-------|-----|-----|
|            | IHC    | FC  | IHC   | FC  | scRNA | IHC | FC  |
| 1          | yes    | no  | no    | no  | no    |     |     |
| 2          | yes    | yes | no    | no  | no    |     |     |
| 3          | yes    | no  | yes   | no  | no    |     |     |
| 4          | yes    | no  | no    | no  | no    |     |     |
| 5          | yes    | yes | yes   | no  | no    |     |     |
| 6          | yes    | yes | yes   | no  | no    |     |     |
| 7          | yes    | yes | yes   | no  | no    |     |     |
| 8          | yes    | no  | yes   | yes | yes   | yes | no  |
| 9          | yes    | yes | no    | no  | yes   | yes | no  |
| 10         | yes    | no  | yes   | yes | yes   |     |     |
| 11         | yes    | no  | yes   | yes | yes   |     |     |
| 12         | yes    | yes | no    | no  | no    |     |     |
| 13         | yes    | yes | yes   | no  | no    |     |     |
| 14         | yes    | yes | no    | no  | no    |     |     |
| 15         | yes    | yes | yes   | no  | yes   |     |     |
| 16         | yes    | yes | yes   | no  | no    | yes | yes |
| 17         | yes    | no  | yes   | no  | no    |     |     |
| 18         | yes    | yes | yes   | no  | no    |     |     |
| 19         | yes    | yes | no    | no  | yes   |     |     |
| 20         | yes    | yes | yes   | yes | yes   |     |     |
| 21         | yes    | yes | yes   | yes | no    |     |     |
| 22         | yes    | yes | no    | no  | no    |     |     |

## Supplementary Table 2. Antibody clones used for immunohistochemistry analysis.

| Antigen | Clone  | Manufacturer |
|---------|--------|--------------|
| BCL2    | 124    | Ventana      |
|         | PG-B6p | Dako         |
| CD2     | MRQ11  | Cell Marque  |
| CD3     | LN10   | Leica        |
| CD4     | SP35   | Cell Marque  |

|            |            |                   |
|------------|------------|-------------------|
| CD5        | SP19       | Ventana           |
|            | 4C7        | Leica             |
| CD7        | MRQ56      | Cell Marque       |
|            | LP15       | Leica             |
| CD8        | SP57       | Ventana           |
|            | 4B11       | Leica             |
| CD10       | SP27       | Ventana           |
|            | 56C6       | Leica             |
| CD19       | BT51E      | Leica             |
| CD20       | L26        | Dako              |
| CD21       | 1F8        | Dako              |
| CD23       | SP23       | Ventana           |
|            | 1B12       | Leica             |
| CD30       | Ber-H2     | Dako              |
| CD79a      | SP18       | Ventana           |
|            | 11E3       | Leica             |
| cMYC       | Y69        | Ventana           |
| Cyclin D1  | EPR2241    | Abcam             |
|            | SP4        | Thermo Scientific |
| EBER-ISH   | N/A        | Ventana           |
| FOXP1      | JC12       | Abcam             |
| Granzyme B | GrB7       | Dako              |
| HGAL       | 1H1-A7     | Invitrogen        |
| IGD        | Polyclonal | Cell Marque       |
| KI67-MIB1  | MIB1       | Dako              |
|            | 30-9       | Ventana           |
| LMO2       | 1A9-1      | Santa Cruz        |
| MUM1       | MUM1p      | Dako              |
|            | EAU32      | Leica             |
| OCT2       | MRQ-2      | Cell Marque       |
| P53        | D07        | Ventana           |
| PAX5       | SP34       | Ventana           |
|            | 1EW        | Leica             |
| SOX-11     | MRQ58      | Cell Marque       |
| TDT        | Polyclonal | Cell Marque       |
|            | SEN28      | Leica             |
| TIA1       | 2G9A10F5   | Biogenex          |

**Supplementary Table 3. Antibody clones used for flow cytometry analysis.**

| Antigen | Clone | Fluorochrome | Manufacturer | Catalog |
|---------|-------|--------------|--------------|---------|
|---------|-------|--------------|--------------|---------|

|        |           |              |                 |             |
|--------|-----------|--------------|-----------------|-------------|
| Kappa  | Polytypic | FITC         | Agilent         | F043401-1   |
| CD8    | REA734    | FITC         | Miltenyi        | 130-110-815 |
| Lambda | Polytypic | PE           | Agilent         | R043701-1   |
| CD56   | N901      | PE           | Beckman Coulter | IM2073U     |
| CD25   | BC96      | PE-Dazzle594 | BioLegend       | 302646      |
| CD22   | SJ10.1H11 | PC5.5        | Beckman Coulter | A80712      |
| TCRCβ1 | JOVI.1    | BB700        | BD Biosciences  | 7497974     |
| CD19   | J3-119    | PC7          | Beckman Coulter | IM3628U     |
| CD10   | ALB1      | APC          | Beckman Coulter | IM3633      |
| CD7    | 8H8.1     | APC-Alexa700 | Beckman Coulter | A70201      |
| CD45   | 2D1       | APC-H7       | BD Biosciences  | 641408      |
| CD5    | L17F12    | BV421        | Biolegend       | 364029      |
| CD38   | HIT2      | BV480        | BD Biosciences  | 566137      |
| CD279  | EH12.2H7  | BV605        | BioLegend       | 329924      |
| CD20   | 2H7       | BV650        | BD Biosciences  | 563780      |
| TCRγδ  | 11F2      | BV711        | BD Biosciences  | 624148      |
| CD2    | RPA-2.10  | BV786        | BD Biosciences  | 740960      |
| CD26   | M-A261    | BUV395       | BD Biosciences  | 744454      |
| CD4    | SK3       | BUV563       | BD Biosciences  | 612912      |
| CD3    | UCHT1     | BUV737       | BD Biosciences  | 612750      |
| CD14   | M5E2      | BUV805       | BD Biosciences  | 612903      |

#### Supplementary Table 4. Pathology review of FFPE specimens.

| Disease | Patient ID | Best Response | Timepoint | CD20                                                                                                            | PAX5           | Other                             |
|---------|------------|---------------|-----------|-----------------------------------------------------------------------------------------------------------------|----------------|-----------------------------------|
| FL      | 10         | CR            | On-Tx     | Patchy membranous and cytoplasmic staining with variable downregulation (negative to dim to moderate intensity) | Strong nuclear | No other B cell markers           |
|         | 15         | CR            | On-Tx     | Negative                                                                                                        | Strong nuclear | CD79a strong membranous staining  |
|         | 16         | CR            | PD        | Negative                                                                                                        | Strong nuclear | No other B cell markers           |
|         | 20         | PD            | On-Tx     | Negative                                                                                                        | Not performed  | CD10 variable membranous staining |
| DLBCL   | 6          | On-Tx         | CR        | Positive on necrotic cells                                                                                      | Not performed  |                                   |
|         | 7          | On-Tx         | CR        | Positive on necrotic cells                                                                                      | Not performed  |                                   |
|         | 8          | On-Tx         | PR        | Strong and diffusely membranous                                                                                 | Not performed  | No other B cell markers           |
|         |            | POD           | PR        | Negative                                                                                                        | Strong nuclear | No other B cell markers           |
|         | 9          | POD           | PR        | Negative                                                                                                        | Strong nuclear | CD19 diffusely positive           |
